# Supplementary material for: Chronic conditions and intrinsic capacity trajectories among Chinese middle-aged and older adults: a nationally representative longitudinal study
Source: Research Square preprint supplement (doi:10.21203/rs.3.rs-6420100/v1), 2025-06-17
Supplement: Supplementary file 1 [file 78723b7cbf6da825157d496f.docx]

**Supplementary Online Content**

Chronic conditions and intrinsic capacity trajectories among Chinese middle-aged and older adults: a nationally representative longitudinal study

Table S1 The available data of the intrinsic capacity and chronic condition over the 4-year study period (N=8,836)

| Dimension | 2011 | 2013 | 2015 |
| --- | --- | --- | --- |
| Depressive symptoms | 8,836 | 8,288 | 8,341 |
| Cognition | 8,836 | 8,065 | 8,198 |
| Vision | 8,836 | 8,316 | 8,340 |
| Hearing | 8,836 | 8,323 | 8,345 |
| Locomotor | 8,836 | 7,068 | 7,533 |
| Vitality | 8,836 | 7,141 | 7,647 |
| Full capacity | 8,836 | 6,751 | 7,327 |
| Number of chronic conditions | 8,836 | 8,516 | 8,439 |
